# Supplementary material
Source: publisher figshare collection journal article supplement (https://acs.figshare.com/ndownloader/files/24370377)
Supplement: Supplementary file 1 [file 24370377]

## Supporting Information

### **Influence of Organic Acids Concentration on Wettability Alteration of Cap-Rock: Implications for CO<sub>2</sub> Trapping/Storage**

Muhammad Ali<sup>a,b,\*</sup>, Adnan Aftab<sup>c</sup>, Zain-Ul-Abedin Arain<sup>a</sup>, Ahmed Al-Yaseri<sup>a,b</sup>, Hamid Roshan<sup>d</sup>, Ali Saeedi<sup>a</sup>, Stefan Iglauder<sup>a,b</sup>, Mohammad Sarmadivaleh<sup>a</sup>,

<sup>a</sup> Western Australia School of Mines, Minerals, Energy and Chemical Engineering, Curtin University, 26 Dick Perry Avenue, Kensington, 6151, WA, Australia

<sup>b</sup> Petroleum Engineering Discipline, School of Engineering, Edith Cowan University, 270 Joondalup Dr, Joondalup, 6027, WA, Australia

<sup>c</sup> Petroleum Engineering Department, Mehran University of Engineering and Technology, Khairpur Mir's Campus, Khairpur Mirs 66020, Sindh, Pakistan

<sup>d</sup> School of Minerals and Energy Resources Engineering, University of New South Wales, Sydney 2052, New South Wales, Australia

\*corresponding author ([Muhammad.ali7@postgrad.curtin.edu.au](mailto:Muhammad.ali7@postgrad.curtin.edu.au))

Table S1. Surface analysis of mica substrates by EDS

| Concentration<br>(Molarity) | Pure Mica |          |          |           |          | After ageing |          |          |           |          | Change due to ageing |          |          |           |          |
|-----------------------------|-----------|----------|----------|-----------|----------|--------------|----------|----------|-----------|----------|----------------------|----------|----------|-----------|----------|
|                             | wt%<br>Si | wt%<br>C | wt%<br>O | wt%<br>Al | wt%<br>K | wt%<br>Si    | wt%<br>C | wt%<br>O | wt%<br>Al | wt%<br>K | wt%<br>Si            | wt%<br>C | wt%<br>O | wt%<br>Al | wt%<br>K |
| Hexanoic Acid               |           |          |          |           |          |              |          |          |           |          |                      |          |          |           |          |
| $10^{-2}$                   | 20.4      | 2.8      | 50.1     | 18.8      | 7.9      | 19.8         | 4.9      | 51.8     | 17.2      | 6.3      | -0.6                 | +2.1     | +1.7     | -1.6      | -1.6     |
| $10^{-3}$                   | 22.1      | 2.4      | 49.6     | 18.2      | 7.7      | 18.7         | 3.9      | 52.4     | 18.3      | 6.7      | -3.4                 | +1.5     | +2.8     | +0.1      | -1.0     |
| $10^{-5}$                   | 23.7      | 3.1      | 46.0     | 19.4      | 7.8      | 20.2         | 4.2      | 50.5     | 17.9      | 7.2      | -3.5                 | +1.1     | +4.5     | -1.5      | -0.6     |
| $10^{-7}$                   | 21.7      | 2.6      | 47.6     | 19.7      | 8.4      | 18.9         | 3.3      | 51.7     | 18.5      | 7.6      | -2.8                 | +0.7     | +4.1     | -1.2      | -0.8     |
| $10^{-9}$                   | 21.1      | 2.9      | 49.2     | 19.3      | 7.5      | 20.7         | 3.4      | 48.4     | 19.1      | 8.4      | -0.4                 | +0.5     | -0.8     | -0.2      | +0.9     |
| 0                           | 21.5      | 3.7      | 46.8     | 19.8      | 8.2      | 21.5         | 3.7      | 46.8     | 19.8      | 8.2      | 0                    | 0        | 0        | 0         | 0        |
| Lauric Acid                 |           |          |          |           |          |              |          |          |           |          |                      |          |          |           |          |
| $10^{-2}$                   | 22.3      | 3.8      | 44.7     | 20.1      | 9.1      | 19.4         | 7.0      | 46.8     | 19.7      | 7.1      | -2.9                 | +3.2     | +2.1     | -0.4      | -2.0     |
| $10^{-3}$                   | 22.4      | 2.4      | 46.5     | 20.4      | 8.3      | 21.7         | 4.0      | 48.8     | 18.6      | 6.9      | -0.7                 | +1.6     | +2.3     | -1.8      | -1.4     |
| $10^{-5}$                   | 21.9      | 2.7      | 47.1     | 19.7      | 8.6      | 22.0         | 3.9      | 48.1     | 17.8      | 8.2      | +0.1                 | +1.2     | +1.0     | -1.9      | -0.4     |
| $10^{-7}$                   | 21.7      | 2.8      | 48.7     | 19.1      | 7.7      | 21.4         | 3.7      | 48.2     | 19.3      | 7.4      | -0.3                 | +0.9     | -0.5     | +0.2      | -0.3     |
| $10^{-9}$                   | 23.2      | 3.1      | 46.9     | 18.7      | 8.1      | 19.7         | 3.8      | 50.7     | 17.9      | 7.9      | -3.5                 | +0.7     | +3.8     | -0.8      | -0.2     |
| 0                           | 21.5      | 3.7      | 46.8     | 19.8      | 8.2      | 21.5         | 3.7      | 46.8     | 19.8      | 8.2      | 0                    | 0        | 0        | 0         | 0        |
| Stearic Acid                |           |          |          |           |          |              |          |          |           |          |                      |          |          |           |          |
| $10^{-2}$                   | 21.1      | 3.3      | 46.7     | 20.2      | 8.7      | 20.2         | 6.7      | 47.1     | 19.3      | 6.7      | -0.9                 | +3.4     | +0.4     | -0.9      | -2.0     |
| $10^{-3}$                   | 22.2      | 3.4      | 45.3     | 20.3      | 8.8      | 22.1         | 6.1      | 46.4     | 18.9      | 6.5      | -0.1                 | +2.7     | +1.1     | -1.4      | -2.3     |
| $10^{-5}$                   | 22.6      | 2.9      | 45.4     | 19.5      | 9.6      | 20.8         | 4.4      | 47.8     | 19.7      | 7.3      | -1.8                 | +1.5     | +2.4     | +0.2      | -2.3     |
| $10^{-7}$                   | 23.4      | 2.6      | 47.0     | 18.7      | 8.3      | 20.5         | 3.6      | 50.2     | 17.9      | 7.8      | -2.9                 | +1.0     | +3.2     | -0.8      | -0.5     |
| $10^{-9}$                   | 23.1      | 3.1      | 45.2     | 19.9      | 8.7      | 19.6         | 4.0      | 50.0     | 19.5      | 6.9      | -3.5                 | +0.9     | +4.8     | -0.4      | -1.8     |
| 0                           | 21.5      | 3.7      | 46.8     | 19.8      | 8.2      | 21.5         | 3.7      | 46.8     | 19.8      | 8.2      | 0                    | 0        | 0        | 0         | 0        |
| Lignoceric Acid             |           |          |          |           |          |              |          |          |           |          |                      |          |          |           |          |
| $10^{-2}$                   | 22.8      | 3.1      | 47.1     | 17.9      | 9.1      | 19.4         | 6.8      | 48.7     | 17.8      | 7.3      | -3.4                 | +3.7     | +1.6     | -0.1      | -1.8     |
| $10^{-3}$                   | 21.9      | 2.9      | 47.5     | 18.9      | 8.8      | 20.7         | 5.6      | 45.5     | 19.8      | 8.4      | -1.2                 | +2.7     | -2.0     | +0.9      | -0.4     |
| $10^{-5}$                   | 23.5      | 2.8      | 45.7     | 19.1      | 8.9      | 19.8         | 4.5      | 48.3     | 19.5      | 7.9      | -3.7                 | +1.7     | +2.6     | +0.4      | -1.0     |
| $10^{-7}$                   | 23.3      | 3.5      | 44.5     | 19.3      | 9.4      | 20.9         | 5.1      | 49.1     | 18.4      | 6.5      | -2.4                 | +1.6     | +4.6     | -0.9      | -2.9     |
| $10^{-9}$                   | 21.7      | 3.1      | 47.0     | 20.1      | 8.1      | 21.4         | 4.2      | 48.2     | 18.6      | 7.6      | -0.3                 | +1.1     | +1.2     | -1.5      | -0.5     |
| 0                           | 21.5      | 3.7      | 46.8     | 19.8      | 8.2      | 21.5         | 3.7      | 46.8     | 19.8      | 8.2      | 0                    | 0        | 0        | 0         | 0        |

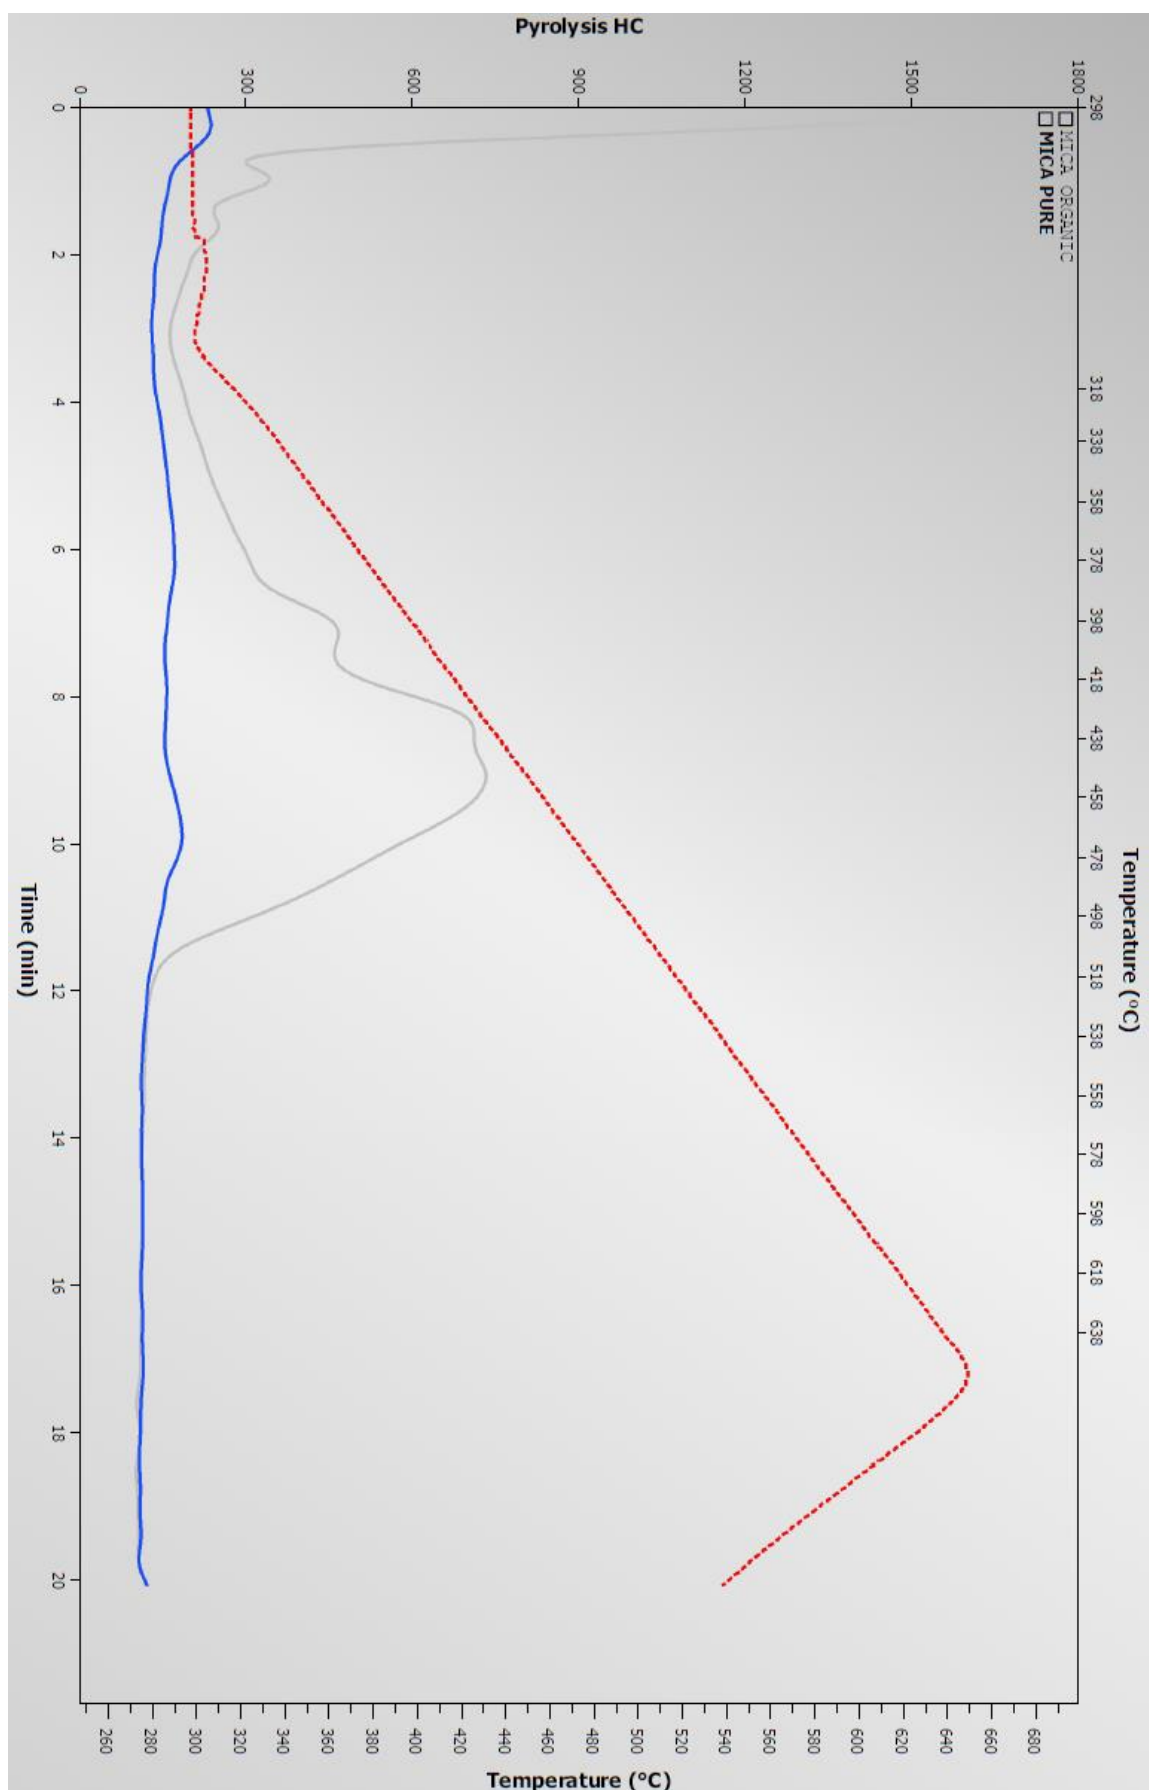

Figure S1. Total Organic Carbon (TOC) determination of pure and aged mica substrates (blue line represent the pure mica substrate and grey line represent the aged mica substrate)

## X-ray Diffraction (XRD) Measurements

XRD is most commonly used to measure bulk mineralogy <sup>1</sup>. The XRD patterns of pure and organic aged mica samples are shown in Figure S2. The measured XRD spectra for (Mica Pure – blue line) showed oriented mica, silica and zeolite <sup>1</sup>; In addition to this, XRD spectra for (Mica Organic – red line) depicted oriented mica superimposed on muscovite/illite pattern with presence of silica and zeolite crystals. These minerals are also abundantly found in shale cap-rock, which makes mica a perfect proxy for cap-rock in pristine form for investigating the effects of organics on wettability.

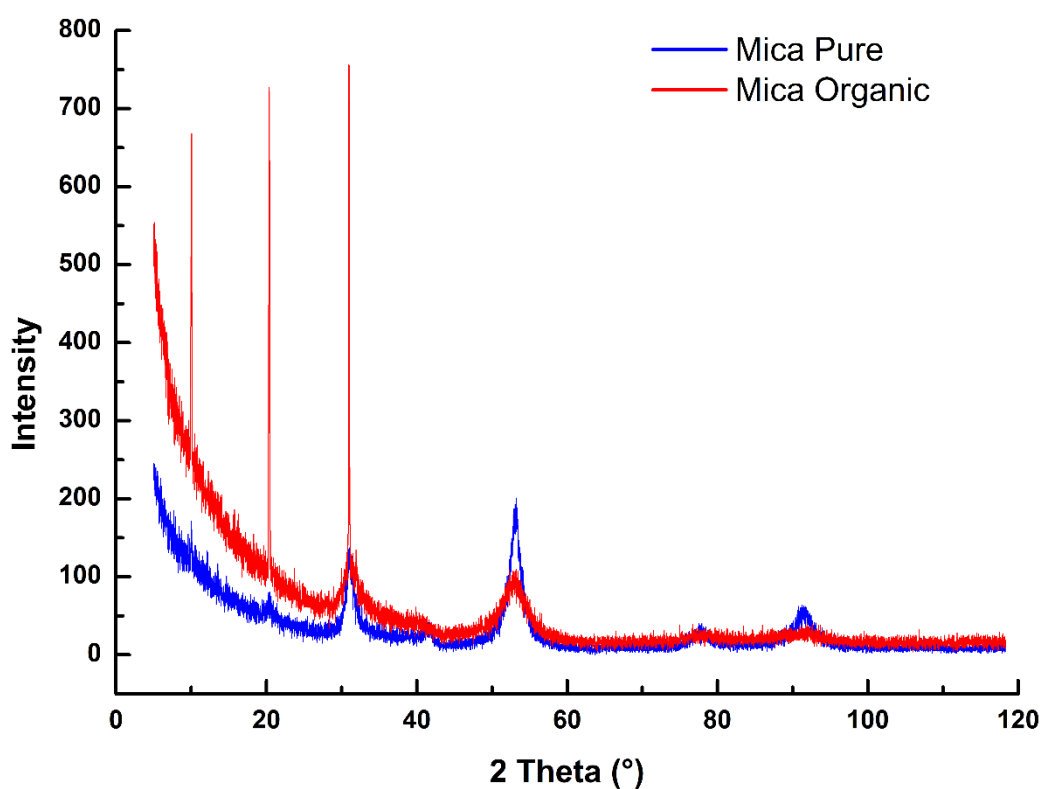

Figure S2. XRD spectra of Pure and Organic aged mica substrates.

## References

1. Eskelinen, P., X-ray diffraction study of TiO<sub>2</sub> thin films on mica. *Journal of solid state chemistry* **1992**, *100* (2), 356-362.
